# Supplementary material for: One-step photochemical deposition of PdAu alloyed nanoparticles on TiO2 nanowires for ultra-sensitive H2 detection
Source: Royal Society of Chemistry journal article supplement (doi:10.1039/c5ta06917c), 2016-01-01
Supplement: c5ta06917c1.pdf [file c5ta06917c1.pdf]

## Supplementary Information

### One-step photochemical deposition of PdAu alloyed nanoparticles on TiO<sub>2</sub> nanowires for ultra-sensitive H<sub>2</sub> detection

Shoutian Ren\*, and Wenjun Liu

Department of Optoelectronic Science, Harbin Institute of Technology at Weihai, Weihai 264209,  
People's Republic of China,

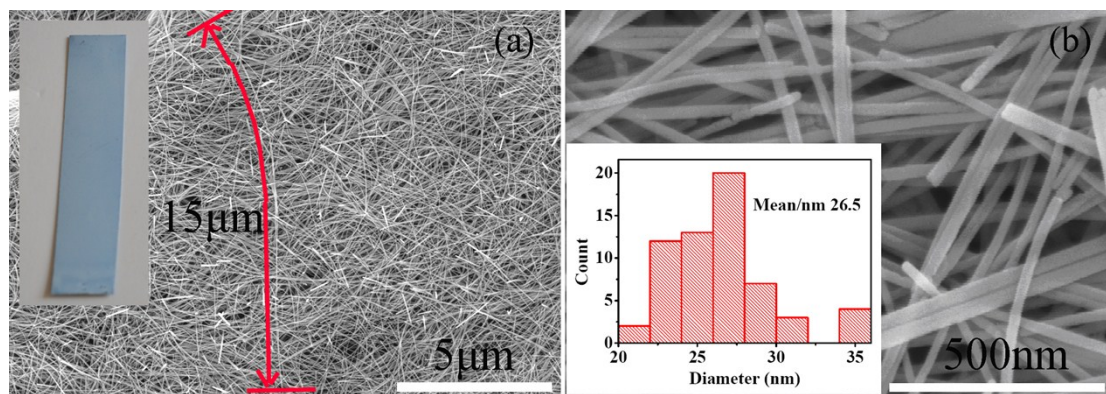

**Fig. S1** SEM pictures of bare TiO<sub>2</sub> nanowires on the Ti foil substrate, and the insets in both panels are the photograph picture of TiO<sub>2</sub> nanowire film and their diameter histogram, respectively.

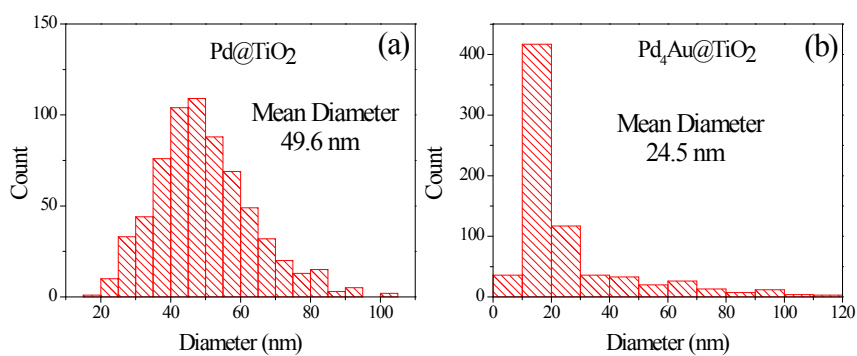

**Fig. S2** Diameter histogram of Pd NPs in Pd@TiO<sub>2</sub> nanowires (a) and Pd<sub>4</sub>Au NPs in Pd<sub>4</sub>Au@TiO<sub>2</sub> nanowires (b).

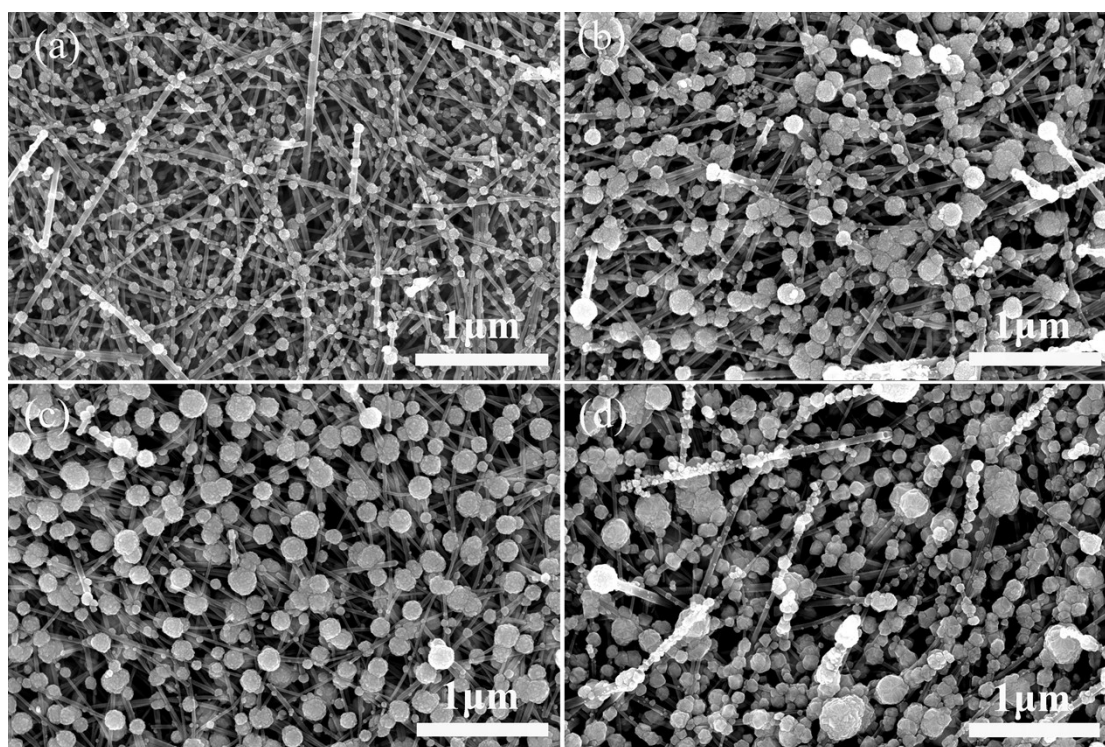

**Fig. S3** SEM pictures of PdAu@TiO<sub>2</sub> with molar ratio of Pd<sup>2+</sup>/Au<sup>3+</sup> = 8 (a), Pd<sup>2+</sup>/Au<sup>3+</sup> = 2 (b), Pd<sup>2+</sup>/Au<sup>3+</sup> = 1 (c), and (d) photodeposition time prolonging to 60 min with Pd<sup>2+</sup>/Au<sup>3+</sup> = 4 in precursor solution.

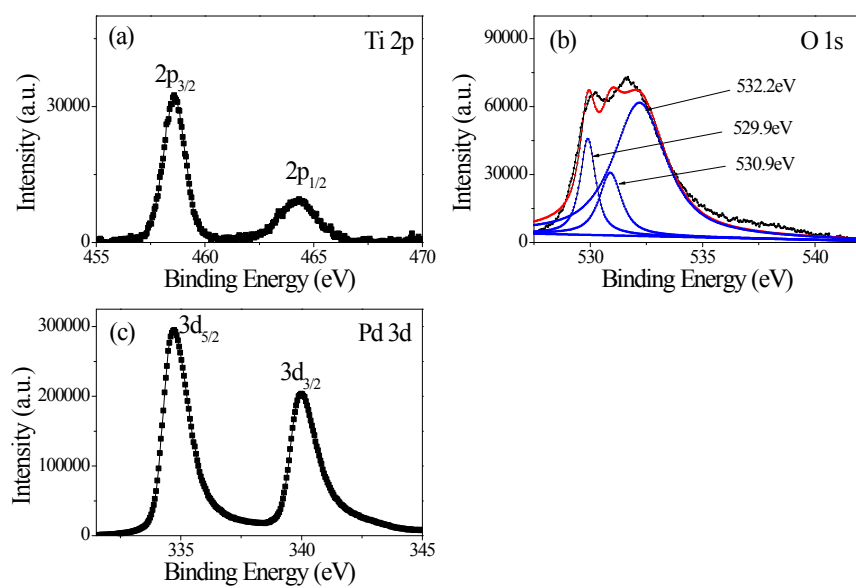

**Fig. S4** XPS spectra of Ti 2p (a), O 1s (b) and Pd 3d (c) in Pd@TiO<sub>2</sub>.

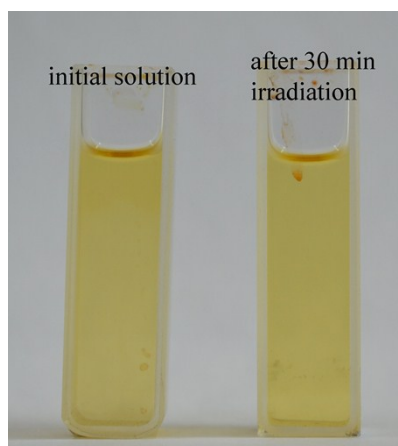

**Fig. S5** Photograph pictures of PdCl<sub>2</sub> solution before and after UV irradiation for 30 min.

## The estimation of precursor consumption in the photodeposition process

We take Pd@TiO<sub>2</sub> sample as an example to estimate the consumption amount of the precursor. As shown in Fig. 1(a), the density of Pd NPs loaded on TiO<sub>2</sub> surface is about 111/μm<sup>2</sup>, and the total area of Pd@TiO<sub>2</sub> nanowires film is 5 cm×1 cm×2 (Note: the factor “2” comes from the both sides of the film). Then the quality of total Pd NPs can be drawn according to the following eqs.

$$m = N \cdot \rho \cdot \frac{\pi}{6} D^3$$

Where  $N$  is the quantity of total Pd NPs, which is the product of the density of Pd NPs and the area of Pd@TiO<sub>2</sub> nanowires film.  $\rho$  is the density of Pd material.  $D$  is the mass diameter of Pd NPs, which is drawn form Fig. S2 (a).

So the total quality of Pd NPs is  $8.44 \times 10^{-5}$  gram, and the quality of Pd element in the precursor is  $8.48 \times 10^{-4}$  gram. Then only 9.95% of precursor is reduced during Pd NPs photodeposition onto the TiO<sub>2</sub> substrate. The similar procedure is used to estimate the effect of the irradiation time. We take Pd<sub>4</sub>Au@TiO<sub>2</sub> sample with UV irradiation for 60 min as an example to perform the above calculation, and the reduction rate of 21.8% is realized.

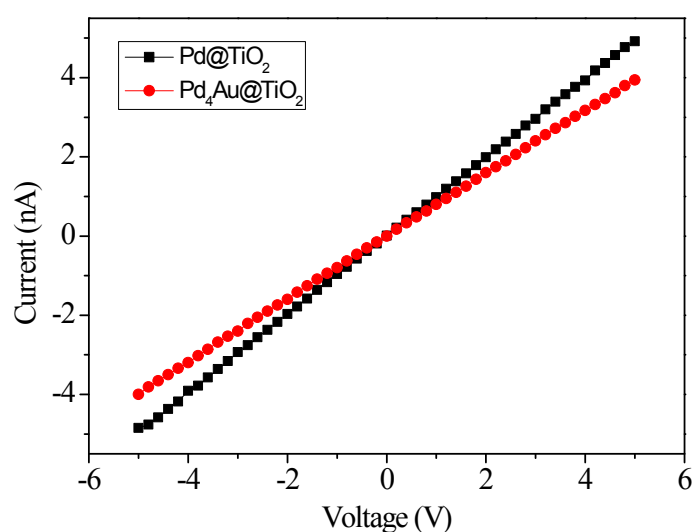

**Fig. S6** The I-V curves of Pd@TiO<sub>2</sub> and Pd<sub>4</sub>Au@TiO<sub>2</sub> nanowires films

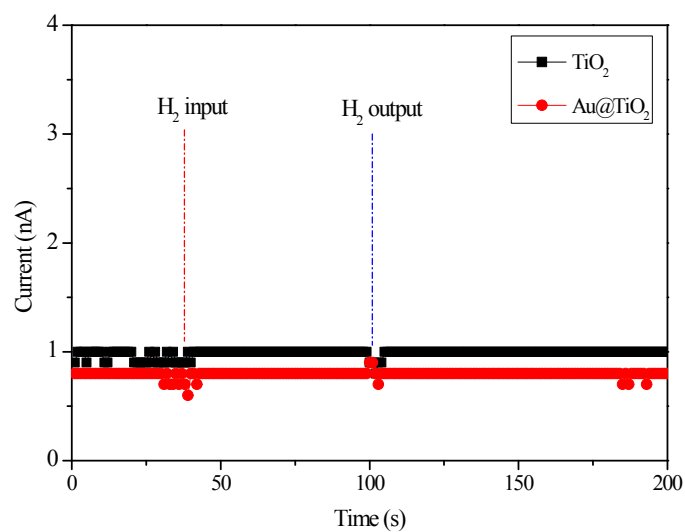

**Fig. S7** The response of bare  $\text{TiO}_2$  and  $\text{Au@TiO}_2$  to 1250 ppm  $\text{H}_2$ .

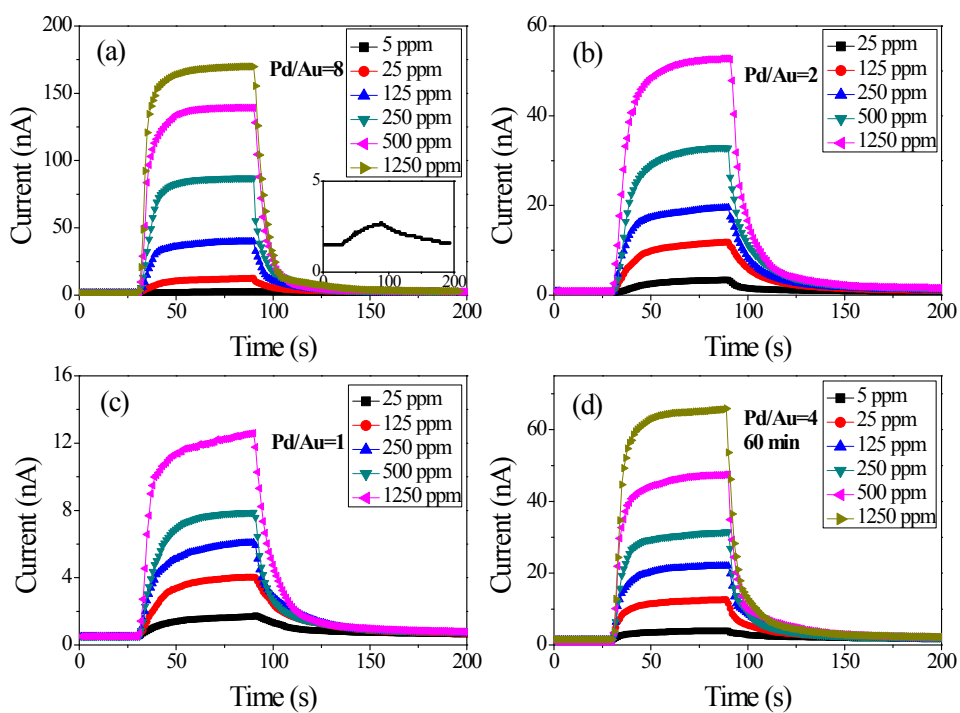

**Fig. S8**  $\text{H}_2$  response of  $\text{PdAu@TiO}_2$  as a function of Pd/Au molar ratio in alloyed NPs and photodeposition time.

**Table S1** The sensitivity and response time of PdAu@TiO<sub>2</sub> as a function of Pd/Au atomic ratio and photodeposition time.

| H <sub>2</sub> concentration (ppm) | 5       | 25    | 125    | 250    | 500     | 1250    |         |
|------------------------------------|---------|-------|--------|--------|---------|---------|---------|
| s (%)                              | Pd/Au=8 | 200.0 | 1277.8 | 4122.2 | 9577.8  | 15355.6 | 18777.8 |
|                                    | Pd/Au=4 | 350.0 | 1762.5 | 6062.5 | 11662.5 | 25275.0 | 44750.0 |
|                                    | Pd/Au=2 | ※     | 243.3  | 1113.3 | 2138.9  | 3455.6  | 5738.9  |
|                                    | Pd/Au=1 | ※     | 256.0  | 714.0  | 1126.5  | 1506.5  | 2454.0  |
|                                    | 60 min  | 333.3 | 1300.0 | 2344.4 | 3400.0  | 5166.7  | 7188.9  |
|                                    | <hr/>   |       |        |        |         |         |         |
| τ <sub>r</sub> (s)                 | Pd/Au=8 | 47    | 32     | 20     | 15      | 14      | 10      |
|                                    | Pd/Au=4 | 21    | 18     | 15.5   | 13.5    | 12      | 10      |
|                                    | Pd/Au=2 | ※     | 49     | 32     | 26      | 23      | 19      |
|                                    | Pd/Au=1 | ※     | 54     | 35     | 30      | 25      | 23      |
|                                    | 60 min  | 24    | 21     | 18     | 15      | 14      | 12      |
|                                    | <hr/>   |       |        |        |         |         |         |

*Note:* ※ denotes no detectable signal.
